# Supplementary material
Source: ML conference proceedings conference paper supplement (https://openreview.net/forum?id=HNytlGv1VjG)
Supplement: supplementary_material [file attachment]

# SUPPLEMENTARY MATERIAL FOR WHAT ARE EFFECTIVE LABELS FOR AUGMENTED DATA? IMPROVING ROBUSTNESS WITH AUTO LABEL

**Anonymous authors**

Paper under double-blind review

## A THE PROPOSED AUTO LABEL ALGORITHM

In Algorithm 1 we describe how AutoLabel works.

---

### Algorithm 1 Pseudocode of AutoLabel

---

- 1: **Input:** A training dataset  $\mathcal{D} = \{(x_i, y_i)\}_{i=1, \dots, m}$ , a validation dataset  $\mathcal{D}_V$  drawn i.i.d. from the same distribution, an augmentation method `Aug`. Number of classes  $K$ , number of training epochs  $T$ , number of distance buckets  $N$  and the hyperparameter  $\alpha$ .
  - 2: We perform `Aug` to obtain the augmented training data  $\text{Aug}(x, s)$ , where the transformation distance  $s$  is determined by the hyperparameters in the `Aug`. We discretize the transformation distance  $s$  into  $N$  buckets  $\{S_1, \dots, S_N\}$ , where each  $S_n$  is a range.
  - 3: For each distance bucket  $S_n$ , we initialize  $\tilde{y}^0(S_n)$  as the one-hot label.
  - 4: **for**  $t = 0$  **to**  $T - 1$  **do**
  - 5:   Minimize cross-entropy loss over the augmented training data with smoothed labels  $\tilde{y}^t(S_n)$ .
  - 6:   **for**  $n = 1$  **to**  $N$  **do**
  - 7:     Generate an augmented validation set:  
 $\mathcal{Q}(S_n) = \{(\text{Aug}(x_i, s), y_i) | (x_i, y_i) \in \mathcal{D}_V, s \sim \mathcal{U}(S_n)\}$ .
  - 8:     Update the label for the true class  $\tilde{y}_{k=y}^{t+1}(S_n)$ :  $\triangleright$  according to Eqn (1)  
 $\tilde{y}_{k=y}^{t+1}(S_n) = \tilde{y}_{k=y}^t(S_n) - \alpha \cdot \text{ECE}^t(\mathcal{Q}(S_n)) \cdot \text{sign}(\text{Conf}^t(\mathcal{Q}(S_n)) - \text{Acc}^t(\mathcal{Q}(S_n)))$
  - 9:     Clip  $\tilde{y}_{k=y}^{t+1}(S_n)$  to be within  $[\text{Acc}^t(\mathcal{Q}(S_n)), 1]$
  - 10:    Update the label for other classes  $\tilde{y}_{k \neq y}^{t+1}(S_n)$ :  $\triangleright$  according to Eqn (2)  
 $\tilde{y}_{k \neq y}^{t+1}(S_n) = (1 - \tilde{y}_{k=y}^{t+1}(S_n)) \cdot \frac{1}{K-1}$   $\triangleright$  according to Eqn (2)
  - 11:   **end for**
  - 12: **end for**
- 

## B ABLATION STUDY

In this section, we compare AutoLabel with:

- Label Smoothing (LS) (Szegedy et al., 2016): which softs labels by sweeping a hyperparameter  $\epsilon$  which controls the smoothing degree in a range to find the best hyperparameter  $\rho$ ,
- Temperature Scaling (TS) (Guo et al., 2017): a post-hoc calibration method which divides the predicted logits by a temperature,
- multiple  $\epsilon$  for adversarial training: which constructs adversarial examples that are bounded by randomly samples  $\epsilon \sim \mathcal{U}(0, \epsilon_{max})$  as AutoLabel but assigning one-labels to the adversarial examples as standard adversarial training (Madry et al., 2017).

We apply these methods to the three data augmentation technique: AugMix (Hendrycks et al., 2020), mixup (Zhang et al., 2018) and adversarial training (Madry et al., 2017). For adversarial training based methods, we use  $\epsilon = 0.01$  for “Adv. Train” and “Adv. Train + LS”, and  $\epsilon_{max} = 0.01$  for “multiple  $\epsilon$ ” as well as AutoLabel. The accuracy and calibration performance on clean and corrupted datasets: CIFAR10 and CIFAR100 are presented in Table 1 and Table 2.

Table 1: Ablation study of `AutoLabel` on improving model’s calibration performance. We report Accuracy and ECE on the CIFAR100 dataset and cAcc and cECE on the CIFAR100-C dataset. All numbers are in % and the best result are highlighted in **bold**.

| Method                   | Acc         | cAcc        | Method                   | Acc         | cAcc        | Method                   | Acc         | cAcc        |
|--------------------------|-------------|-------------|--------------------------|-------------|-------------|--------------------------|-------------|-------------|
| AugMix                   | 80.6        | 63.9        | mixup                    | 80.8        | 55.6        | Adv. Train               | 71.5        | 58.1        |
| + LS                     | 80.7        | 64.7        | + LS                     | -           | -           | + LS                     | 71.9        | 58.1        |
| + TS                     | 80.6        | 63.9        | + TS                     | 80.8        | 55.6        | + multiple $\epsilon$    | 74.6        | 12.9        |
| + <code>AutoLabel</code> | <b>81.6</b> | <b>65.0</b> | + <code>AutoLabel</code> | <b>81.2</b> | <b>56.9</b> | + <code>AutoLabel</code> | <b>75.3</b> | <b>60.2</b> |
| Method                   | ECE         | cECE        | Method                   | ECE         | cECE        | Method                   | ECE         | cECE        |
| AugMix                   | 5.1         | 11.8        | mixup                    | 1.8         | 11.2        | Adv. Train               | 8.0         | 13.5        |
| + LS                     | 2.5         | 6.8         | + LS                     | -           | -           | + LS                     | 6.4         | <b>6.5</b>  |
| + TS                     | 2.5         | 7.1         | + TS                     | 3.1         | 13.9        | + multiple $\epsilon$    | 7.0         | 12.9        |
| + <code>AutoLabel</code> | <b>1.8</b>  | <b>4.3</b>  | + <code>AutoLabel</code> | <b>1.2</b>  | <b>10.0</b> | + <code>AutoLabel</code> | <b>4.2</b>  | 6.9         |

Table 2: Ablation study of `AutoLabel` on improving model’s calibration performance. We report Accuracy and ECE on the CIFAR10 dataset and cAcc and cECE on the CIFAR10-C dataset. All numbers are in % and the best result are highlighted in **bold**.

| Method                   | Acc         | cAcc        | Method                   | Acc         | cAcc        | Method                   | Acc         | cAcc        |
|--------------------------|-------------|-------------|--------------------------|-------------|-------------|--------------------------|-------------|-------------|
| AugMix                   | 96.9        | 87.7        | mixup                    | 96.2        | 81.1        | Adv. Train               | 93.6        | 83.9        |
| + LS                     | 96.8        | 88.2        | + LS                     | -           | -           | + LS                     | 93.1        | 83.6        |
| + TS                     | 96.9        | 87.7        | + TS                     | 96.2        | 81.1        | + multiple $\epsilon$    | 94.3        | <b>84.5</b> |
| + <code>AutoLabel</code> | <b>96.9</b> | <b>88.2</b> | + <code>AutoLabel</code> | <b>96.7</b> | <b>81.3</b> | + <code>AutoLabel</code> | <b>94.6</b> | 83.6        |
| Method                   | ECE         | cECE        | Method                   | ECE         | cECE        | Method                   | ECE         | cECE        |
| AugMix                   | 1.0         | 4.1         | mixup                    | 0.8         | 8.8         | Adv. Train               | 3.7         | 10.5        |
| + LS                     | 0.9         | 3.1         | + LS                     | -           | -           | + LS                     | 6.5         | 7.0         |
| + TS                     | <b>0.6</b>  | 2.9         | + TS                     | <b>0.5</b>  | 9.4         | + multiple $\epsilon$    | 3.4         | 10.0        |
| + <code>AutoLabel</code> | 0.9         | <b>2.7</b>  | + <code>AutoLabel</code> | 0.6         | <b>8.5</b>  | + <code>AutoLabel</code> | <b>2.0</b>  | <b>6.5</b>  |

## C IMPLEMENTATION DETAILS

We train the vanilla models on CIFAR10, CIFAR100 and ImageNet using the open-sourced code for uncertainty baselines at <https://github.com/google/uncertainty-baselines/tree/master/baselines>.

### C.1 AUGMIX

For AugMix (Hendrycks et al., 2020), the max depth of the augmentation chain is  $d_{max} = 3$  for three datasets following the original work.

When applying label smoothing to AugMix, we sweep the hyperparameter  $\rho$  which decides the smoothing degree in a range  $[0, 0.1]$  with a step size 0.01 and find the best  $\rho = 0.01$  for CIFAR100  $\rho = 0.02$  for CIFAR100 and  $\rho = 0.01$  for ImageNet.

When applying `AutoLabel` to AugMix, we set the number of distance buckets to be  $d_{max} \cdot N = 3 \cdot 5 = 15$  for three datasets. The hyperparameter  $\alpha$  in Eqn (1) is sweep in a set and we choose the best  $\alpha = 0.01$  for CIFAR10 and  $\alpha = 0.02$  for CIFAR100 and ImageNet.

### C.2 MIXUP

When applying `AutoLabel` to mixup, we set the number of distance buckets to be  $N = 5$  for three datasets. The hyperparameter  $\alpha$  in Eqn (1) is sweep in a set and we choose the best  $\alpha = 0.005$  for CIFAR10 and  $\alpha = 0.008$  for CIFAR100.

### C.3 ADVERSARIAL TRAINING

To improve adversarial training to be beneficial to calibration, we train all the models with  $\ell_\infty$  norm based PGD attacks bounded by  $\epsilon_{max} = 0.01$ . We construct PGD attacks with 10 iterations and the step size is set to be  $\epsilon/4$ . When we apply label smoothing to adversarial training, we sweep the hyperparameter  $\rho \in \{0.1, 0.2, 0.3\}$  and use the best  $\rho = 0.1$  for both CIFAR10 and CIFAR100. When applying AutoLabel to adversarial training, we set the number of distance buckets to be  $N = 10$  and the hyperparameter  $\alpha = 0.5$  for CIFAR10 and  $\alpha = 0.01$  for CIFAR100.

To show the adversarial robustness of all the models involving adversarial training, we train each model with  $\epsilon_{max} \in \{0.01, 0.02, 0.03, 0.05, 0.1\}$  and then report the best model with the strongest adversarial robustness. In Figure 3 of the main text, we report the best performance of each model, where  $\epsilon_{max} = 0.03$  for AT on both CIFAR10 and CIFAR100,  $\epsilon_{max} = 0.1$  for CCAT on both CIFAR10 and CIFAR100. For AutoLabel, we set the number of distance buckets to be  $N = 10$  and the hyperparameter  $\alpha = 0.05$ ,  $\epsilon_{max} = 0.01$  for CIFAR10 and  $\alpha = 1$ ,  $\epsilon_{max} = 0.1$  for CIFAR100.

### REFERENCES

- Chuan Guo, Geoff Pleiss, Yu Sun, and Kilian Q. Weinberger. On calibration of modern neural networks. In *International Conference on Machine Learning*, 2017.
- Dan Hendrycks, Norman Mu, Ekin Dogus Cubuk, Barret Zoph, Justin Gilmer, and Balaji Lakshminarayanan. Augmix: A simple data processing method to improve robustness and uncertainty. In *International Conference on Learning Representations*, 2020.
- Aleksander Madry, Aleksandar Makelov, Ludwig Schmidt, Dimitris Tsipras, and Adrian Vladu. Towards deep learning models resistant to adversarial attacks. In *International Conference on Learning Representations*, 2017.
- Christian Szegedy, Vincent Vanhoucke, Sergey Ioffe, Jon Shlens, and Zbigniew Wojna. Rethinking the inception architecture for computer vision. *2016 IEEE Conference on Computer Vision and Pattern Recognition*, pp. 2818–2826, 2016.
- Hongyi Zhang, Moustapha Cissé, Yann Dauphin, and David Lopez-Paz. Mixup: Beyond empirical risk minimization. In *International Conference on Learning Representation*, 2018.
